# Supplementary material for: MORAb-202, an Antibody–Drug Conjugate Utilizing Humanized Anti-human FRα Farletuzumab and the Microtubule-targeting Agent Eribulin, has Potent Antitumor Activity
Source: Oxford University Press journal article supplement (doi:10.1158/1535-7163.mct-17-1215), 2018-09-27
Supplement: 15357163mct171215-sup-193553_3_supp_4964320_pdgjtv.doc [file 15357163mct171215-sup-193553_3_supp_4964320_pdgjtv.doc]

Supplementary Data Figure S1

Eribulin compound structures and synthetic methods

*Mal-PEG2-Val-Cit-PAB-eribulin*

Eribulin (61.5 mg, 0.074 mmol) was dissolved in *N*,*N*-dimethylformamide (DMF) (6.0 mL) and then mixed with Hunig Base (0.027 mL, 0.156 mmol) and Fmoc-Val-Cit-PAB-PNP (86 mg, 0.112 mmol, Levena). The reaction was stirred at room temperature for 18 h until the coupling was complete, as determined by high performance liquid chromatography (HPLC) analysis. Diethylamine (0.078 mL, 0.745 mmol) was added to the mixture, and the mixture was stirred for an additional 2 h until the reaction was complete. The solvent was removed by evaporation, and the residue was purified by flash chromatography to obtain NH2-Val-Cit-PAB-eribulin as a white solid (60 mg, 71% yield). 1HNMR (400 MHz, CD3OD) δ ppm 7.56 (d, *J* = 8.4 Hz, 2H), 7.32 (d, *J* = 8.4 Hz, 2H), 5.14 (s, 1H), 5.06 (d, *J* = 12.4 Hz, 1H), 5.03 (s, 1H), 5.01 (d, *J* = 12.4 Hz, 1H), 4.87 (s, 1H), 4.83 (s, 1H), 4.71 (t, *J* = 4.4 Hz, 1H), 4.62 (t, *J* = 4.4 Hz, 1H), 4.57 (dd, *J* = 4.8, 8.8 Hz, 1H), 4.47 (d, *J* = 10.8 Hz, 1H), 4.32-4.27 (m, 2H), 4.18 (dd, *J* = 4.8, 6.4 Hz, 1H), 4.13-4.07 (m, 2H), 3.98 (t, *J* = 10.4 Hz, 1H), 3.88-3.82 (m, 3H), 3.76-3.70 (m, 4H), 3.60 (d, *J* = 6.0 Hz, 1H), 3.38 (s, 3H), 3.26-3.10 (m, 3H), 2.93 (dd, *J* = 2.0, 11.2 Hz, 1H), 2.91-2.84 (m, 1H), 2.75-2.64 (m, 2H), 2.44-2.29 (m, 5H), 2.21-1.97 (m, 8H), 1.93-1.83 (m, 3H), 1.79-1.72 (m, 5H), 1.68-1.29 (m, 8H), 1.11 (d, *J* = 6.8 Hz, 3H), 1.07-1.01 (m, 1H), 1.06 (d, *J* = 7.2 Hz, 3H), 1.02 (d, *J* = 7.2 Hz, 3H). LCMS (M+H)=1135.7.

NH2-Val-Cit-PAB-eribulin (16 mg, 14 µmol) was dissolved in DMF (1 mL). *N,N*-diisopropylethylamine (7.2 µL, 41 µmol) and Mal-PEG2-NHS (9.7 mg, 27 µmol, Thermo-Fisher) were then added to this solution at room temperature, and the reaction mixture was stirred at room temperature for 1 h. Upon completion of the reaction, the crude mixture was purified by reverse-phase HPLC using an acetonitrile-water mobile phase containing 0.1% formic acid. The collected fractions were concentrated under vacuum at room temperature in a non-heated water bath to yield Mal-PEG2-Val-Cit-PAB-eribulin (7.1 mg, 5.2 µmol, 38% yield). 1HNMR (400 MHz, CD3OD) δ ppm 7.59 (d, *J* = 8.4 Hz, 2H), 7.31 (d, *J* = 8.4 Hz, 2H), 6.81 (s, 2H), 5.13 (s, 1H), 5.06 (d, *J* = 12.4 Hz, 1H), 5.02 (s, 1H), 5.01 (d, *J* = 12.4 Hz, 1H), 4.87 (s, 1H), 4.82 (s, 1H), 4.71 (t, *J* = 4.0 Hz, 1H), 4.61 (t, *J* = 4.4 Hz, 1H), 4.50 (dd, *J* = 5.2, 9.2 Hz, 1H), 4.47 (d, *J* = 10.8 Hz, 1H), 4.32-4.27 (m, 2H), 4.19 (dd, *J* = 6.8, 11.6 Hz, 1H), 4.13-4.07 (m, 2H), 3.98 (t, *J* = 10.4 Hz, 1H), 3.88-3.82 (m, 3H), 3.76-3.64 (m, 6H), 3.62-3.51 (m, 6H), 3.38 (s, 3H), 3.22-3.08 (m, 4H), 2.93 (dd, *J* = 2.4, 9.6 Hz, 1H), 2.92-2.84 (m, 1H), 2.76-2.63 (m, 2H), 2.52 (t, *J* = 6.0 Hz, 2H), 2.44-2.29 (m, 5H), 2.21-1.97 (m, 8H), 1.93-1.83 (m, 3H), 1.80-1.66 (m, 5H), 1.66-1.28 (m, 10H), 1.11 (d, *J* = 6.4 Hz, 3H), 1.07-1.01 (m, 1H), 0.99 (d, *J* = 6.8 Hz, 3H), 0.97 (d, *J* = 6.4 Hz, 3H). LCMS (M+H)=1374.9.

*Mal-PEG8-Val-Cit-PAB-eribulin*

NH2-Val-Cit-PAB-eribulin (10 mg, 8.808 µmol) and 2,5-dioxopyrrolidin-1-yl 1-(2,5-dioxo-2,5-dihydro-1H-pyrrol-1-yl)-3-oxo-7,10,13,16,19,22,25,28-octaoxa-4-azahentriacontan-31-oate (6.07 mg, 8.808 µmol) were mixed in DMF (1 mL), followed by the addition of Et3N (9.82 µl, 0.07 mmol). The reaction mixture was stirred at room temperature for 18 h until HPLC analysis indicated the completion of the reaction. The solvent was removed by evaporation, and the residue was purified by flash chromatography to yield Mal-PEG8-Val-Cit-PAB-eribulin as a white solid (3.0 mg, 20% yield). 1HNMR (400 MHz, CD3OD) δ ppm 7.58 (d, *J* = 8.4 Hz, 2H), 7.29 (d, *J* = 8.4 Hz, 2H), 6.80 (s, 2H), 5.12 (s, 1H), 5.04 (d, *J* = 12.4 Hz, 1H), 5.01 (s, 1H), 4.99 (d, *J* = 12.4 Hz, 1H), 4.85 (s, 1H), 4.80 (s, 1H), 4.69 (t, *J* = 4.4 Hz, 1H), 4.59 (t, *J* = 4.4 Hz, 1H), 4.50-4.42 (m, 2H), 4.32-4.24 (m, 2H), 4.20-4.14 (m, 2H), 4.12-4.04 (m, 3H), 3.96 (t, *J* = 10.4 Hz, 1H), 3.86-3.80 (m, 3H), 3.76-3.57 (m, 4H), 3.48 (t, *J* = 6.0 Hz, 1H), 3.36 (s, 3H), 3.20-3.08 (m, 3H), 2.91 (dd, *J* = 2.0, 11.2 Hz, 1H), 2.90-2.82 (m, 1H), 2.74-2.60 (m, 2H), 2.44-2.29 (m, 5H), 2.21-1.97 (m, 10H), 1.93-1.83 (m, 3H), 1.79-1.20 (m, 19H), 1.09 (d, *J* = 6.8 Hz, 3H), 1.04-0.98 (m, 1H), 0.99 (d, *J* = 7.2 Hz, 3H), 0.97 (d, *J* = 7.2 Hz, 3H). LCMS (M+H)=1711.6.

*Mal-(CH2)5-Val-Cit-PAB-eribulin*

Eribulin (10 mg, 0.012 mmol) was dissolved in DMF (1 mL), and mixed with MC-Val-Cit-PAB-PNP (9.02 mg, 0.012 mmol, Levena) and Hunig's Base (4.44 µL, 0.025 mmol). The mixture was then stirred at room temperature for 12 h until HPLC analysis indicated the completion of the reaction. The reaction mixture was concentrated and purified by flash chromatography to yield Mal-(CH2)5-Val-Cit-PAB-eribulin as a white solid (11.3 mg, 63% yield). 1HNMR (400 MHz, CD3OD) δ ppm 7.57 (d, *J* = 8.4 Hz, 2H), 7.31 (d, *J* = 8.4 Hz, 2H), 6.79 (s, 2H), 5.13 (s, 1H), 5.05 (d, *J* = 12.4 Hz, 1H), 5.02 (s, 1H), 5.00 (d, *J* = 12.4 Hz, 1H), 4.87 (s, 1H), 4.83 (s, 1H), 4.71 (t, *J* = 4.4 Hz, 1H), 4.61 (t, *J* = 4.4 Hz, 1H), 4.56-4.46 (m, 3H), 4.35-4.27 (m, 2H), 4.20-4.07 (m, 4H), 3.98 (t, *J* = 10.8 Hz, 1H), 3.87-3.83 (m, 3H), 3.73-3.70 (m, 2H), 3.48 (t, *J* = 7.6 Hz, 2H), 3.38 (s, 3H), 3.20-3.08 (m, 4H), 2.93 (dd, *J* = 1.6, 9.6 Hz, 1H), 2.89-2.85 (m, 1H), 2.69 (dt, *J* = 11.2, 16.8 Hz, 2H), 2.44-2.33 (m, 5H), 2.27-1.83 (m, 13H), 1.78-1.68 (m, 5H), 1.66-1.27 (m, 14H), 1.11 (d, *J* = 7.2 Hz, 3H), 1.07-0.98 (m, 1H), 0.98 (d, *J* = 7.2 Hz, 3H), 0.96 (d, *J* = 7.2 Hz, 3H). LCMS (M+H)=1328.9.

*Azido-PEG4-Val-Cit-PAB-eribulin*

NH2-Val-Cit-PAB-eribulin (16 mg, 14.1µmol) was dissolved in DMF (1.5mL). Hunig's Base (7.2 µL, 41 µmol) and azido-PEG4-NHS (11 mg, 28.2 µmol) were added. The reaction mixture was stirred at room temperature for 3 h. The reaction mixture was purified by HPLC (water—acetonitrile gradient 48-72% containing 0.1% formic acid), the eluent was collected at m/z 1409, and lyophilized to afford azido-PEG4-Val-Cit-PAB-Eribulin (13 mg, 65% yield). LCMS (M+H) = 1407.7 Da.

*Mal-PEG2-Ala-Ala-Asn-PAB-eribulin*

Eribulin (10 mg, 0.014 mmol) was dissolved in DMF (0.5 mL), and mixed with Hunig's Base (3.59 µL, 0.021 mmol). (9H-fluoren-9-yl)methyl ((S)-1-(((S)-1-(((S)-4-amino-1-((4-((((4-nitrophenoxy)carbonyl)oxy)methyl)phenyl)amino)-1,4-dioxobutan-2-yl)amino)-1-oxopropan-2-yl)amino)-1-oxopropan-2-yl)carbamate (15.76 mg, 0.021 mmol) was then added, and the resulting yellow solution was stirred at room temperature for 3 days until HPLC analysis indicated the complete consumption of the starting material. Diethylamine (14.23 µL, 0.137 mmol) was added to the reaction mixture, which was then stirred at room temperature for an additional 2 h until there was 100% cleavage of Fmoc protection. The reaction mixture was concentrated to remove diethylamine, and the residue was re-dissolved in DMF (1.5 mL). Et3N (0.015 mL, 0.11 mmol) was added at room temperature, followed by the addition of 2,5-dioxopyrrolidin-1-yl 3-(2-(2-(2,5-dioxo-2,5-dihydro-1H-pyrrol-1-yl)ethoxy)ethoxy)propanoate (9.71 mg, 0.027 mmol). The reaction mixture was stirred at room temperature for 16 h until the reaction was complete, as determined by LCMS analysis. The mixture was concentrated under high vacuum, and purified by flash chromatography to obtain Mal-PEG2-Ala-Ala-Asn-PAB-eribulin (9.2 mg, 49% yield) as a colorless oil.1HNMR (400 MHz) δ ppm 9.23 (s, 1H), 8.00 (d, *J* = 7.6 Hz, 1H), 7.61 (d, *J* = 8.4 Hz, 2H), 7.38 (d, *J* = 6.8 Hz, 1H), 7.24 (d, *J* = 8.4 Hz, 2H), 7.13 (d, *J* = 7.2 Hz, 1H), 6.68 (s, 2H), 6.30 (br s, 1H), 6.04-6.00 (m, 1H), 5.77 (br s, 1H), 5.42 (br s, 1H), 5.07 (s, 1H), 5.06-4.98 (m, 2H), 4.93 (s, 1H), 4.88 (s, 1H), 4.90-4.82 (m, 1H), 4.80 (s, 1H), 4.69 (t, *J* = 4.0 Hz, 1H), 4.60 (t, *J* = 4.0 Hz, 1H), 4.49-4.42 (m, 1H), 4.38-4.25 (m, 4H), 4.19 (t, *J* = 4.8 Hz, 1H), 4.15-4.08 (m, 1H), 4.03 (t, *J* = 4.8 Hz, 1H), 3.97-3.85 (m, 3H), 3.83-3.50 (m, 12H), 3.41 (s, 3H), 3.50-3.10 (m, 3H), 3.02-2.64 (m, 6H), 2.52-2.30 (m, 7H), 2.30-1.65 (m, 14H), 1.65-1.20 (m, 12H), 1.10 (d, *J* = 6.8 Hz, 3H), 1.13-1.05 (m, 1H). LCMS (M+Na)=1396.6.

*Azido-PEG3-disulfidyl dimethyl-PAB-eribulin*

4-(((tert-butyldimethylsilyl)oxy)methyl)benzoic acid (1.0 g, 3.754 mmol) was dissolved in dichloromethane (DCM) (25 mL) cooled to 0°C. Triethylamine (0.549 mL, 3.941 mmol) was then added, followed by diphenyl phosphorazidate (1.085 mg, 3.941 mmol). The reaction mixture was slowly warmed to room temperature and stirred for 14 h. The crude mixture was diluted with ethyl acetate (EtOAc)/Hep (1:1, 100 mL), and passed through a short silica plug eluting with EtOAc/Hep (50%). The solvent was removed under vacuum to yield 1.10 g of 4-(((tert-butyldimethylsilyl)oxy)methyl)benzoyl azide. 1H NMR (400 MHz) δ ppm 7.98 (d, 2 H, *J* = 8.0 Hz), 7.40 (d, 2 H, *J* = 8.0 Hz), 4.79 (s, 2 H), 0.94 (s, 9 H), 0.10 (s, 6 H).

4-(((tert-butyldimethylsilyl)oxy)methyl) benzoyl azide (1.1 g, 3.775 mmol), dissolved in toluene (20 mL), was heated at 110°C for 3 h. Although the product did not show as a single spot, thin layer chromatography (TLC) analysis indicated that the starting material was consumed. The reaction mixture was then cooled to room temperature, and transferred to a vial sealed under nitrogen and stored as a solution in toluene (1 mL = 32.6 mg) at -20°C.

Triethylamine (0.099 mL, 0.709 mmol) was added to a solution of tert-butyl((4-isocyanatobenzyl)oxy)dimethylsilane (165 mg, 0.626 mmol) in toluene (5 mL), followed by alcohol (90.0 mg, 0.591 mmol), and the reaction mixture was stirred for 6 h at 36°C. Progress of the reaction was monitored by UPLC/MS. A saturated solution of sodium hydrogen carbonate (NaHCO3) (10 mL) was then added, extracted with EtOAc/Hep (1:1, 60 mL), washed with brine, dried over sodium sulfate, and concentrated. The crude material was purified by flash chromatography (EtOAc/Hep 10% to 40%) to obtain 215 mg of 2-methyl-2-(methyldisulfanyl)propyl(4-(((tert-butyldimethylsilyl) oxy)methyl)phenyl)carbamate. 1H NMR (400 MHz, ) δ ppm 7.34 (d, 2 H, *J* = 8.4 Hz), 7.26 (d, 2 H, *J* = 7.6 Hz), 6.63 (br. s, 1 H), 4.69 (s, 2 H), 4.17 (s, 2 H), 2.42 (s, 3 H), 1.35 (s, 6 H), 0.93 (s, 9 H), 0.08 (s, 6 H).

2-methyl-2-(methyldisulfanyl)propyl (4-(((tert-butyldimethylsilyl)oxy)methyl)phenyl)carbamate (198 mg, 0.476 mmol) and 2-(2-(2-(2-azidoethoxy)ethoxy)ethoxy)ethyl 4-methylbenzenesulfonate (325 mg, 0.87 mmol) were dissolved in DMF (6.6 mL). Cesium carbonate (621 mg, 1.905 mmol) was then added, followed by tetrabutylammoniumiodide (45 mg, 0.122 mmol), and the reaction mixture was stirred for 15 h at 36°C. Progress of the reaction was monitored by UPLC/MS. A saturated solution of NH4Cl (30 mL) was then added, extracted with EtOAc/Hep (2:1, 150 mL), washed with brine (10 mL), dried over sodium sulfate, and concentrated under vacuum. The crude material was purified by flash chromatography (EtOAc/Hep 20% to 50%) to obtain 248 mg of 2-methyl-2-(methyldisulfanyl)propyl (2-(2-(2-(2-azidoethoxy)ethoxy) ethoxy)ethyl)(4-(((tert-butyldimethylsilyl)oxy)methyl)phenyl)carbamate. 1H NMR (400 MHz) δ ppm 7.28 (d, 2 H, *J* = 8.4 Hz), 7.20 (d, 2 H, *J* = 8.0 Hz), 4.73 (s, 2 H), 4.06 (br. s, 2 H), 3.83 (dd, 2 H, *J* = 6.4, 5.6 Hz), 3.68- 3.56 (m, 12 H), 3.37 (dd, 2 H, *J* = 5.6, 5.2 Hz), 2.33 (s, 3 H), 1.14 (br. s, 6 H), 0.93 (s, 9 H), 0.09 (s, 6 H).

2-methyl-2-(methyldisulfanyl)propyl (2-(2-(2-(2-azidoethoxy)ethoxy)ethoxy)ethyl)(4-(((tert-butyldimethylsilyl)oxy)methyl)phenyl)carbamate (81 mg, 0.131 mmol) was dissolved in a mixture of methanol (5 mL) and water (0.5 mL). Acetic acid (0.5 mL, 8.734 mmol) was then added to the reaction mixture, and stirred for 14 h at 38°C. The reaction mixture was cooled to room temperature, and the solvent was removed under vacuum. The residue was diluted with EtOAc (30 mL), washed with water (2 X 5 mL), NaHCO3, and brine (3 mL), dried over sodium sulfate, and concentrated under vacuum. The crude material was purified by flash chromatography (EtOAc/Hep 30% to 90%) to obtain 61.0 mg of 2-methyl-2-(methyldisulfanyl)propyl (2-(2-(2-(2-azidoethoxy)ethoxy)ethoxy) ethyl)(4-(hydroxymethyl)phenyl)carbamate. 1H NMR (400 MHz) δ ppm 7.34 (d, 2 H, *J* = 8.8 Hz), 7.26 (d, 2 H, *J* = 8.0 Hz), 4.69 (d, 2 H, *J* = 4.4 Hz), 4.06 (br. s, 2 H), 3.84 (dd, 2 H, *J* = 6.2, 6.2 Hz), 3.66- 3.56 (m, 12 H), 3.37 (dd, 2 H, *J* = 5.2, 5.2 Hz), 2.33 (s, 3 H), 1.74 (br. s, 1 H), 1.14 (br. s, 6 H).

2-methyl-2-(methyldisulfanyl)propyl (2-(2-(2-(2-azidoethoxy)ethoxy)ethoxy)ethyl)(4-(hydroxymethyl)phenyl)carbamate (60 mg, 0.119 mmol) was dissolved in DCM (2 mL) and Py (0.019 mL, 0.239 mmol) cooled to 0°C. 4-nitrophenyl carbonochloridate (38.5 mg, 0.191 mmol) in DCM (2 mL) and dimethylaminopyridine (DMAP) (2.9 mg, 0.024 mmol) were then added, and the reaction mixture was stirred for 30 min at 0°C. The reaction mixture was slowly warmed to room temperature, and stirred until the starting material was consumed (approximately 2.5 h). The solvent was then removed under vacuum, and the residue was purified by flash chromatography (EtOAc/Hep 10% to 35%) to obtain 78 mg of 2-methyl-2-(methyldisulfanyl)propyl (2-(2-(2-(2-azidoethoxy)ethoxy)ethoxy) ethyl)(4-((((4-nitrophenoxy)carbonyl)oxy)methyl)phenyl)carbamate. 1H NMR (400 MHz) δ ppm 8.27 (dd, 2 H, *J* = 6.8, 2.4 Hz), 7.41 (d, 2 H, *J* = 8.8 Hz), 7.37 (dd, 2 H, *J* = 7.2, 2.4 Hz), 7.33(d, 2 H, *J* = 8.8 Hz), 5.27 (s, 2 H), 4.08 (br. s, 2 H), 3.85 (dd, 2 H, *J* = 5.8, 5.8 Hz), 3.66- 3.57 (m, 12 H), 3.36 (dd, 2 H, *J* = 5.2, 5.2 Hz), 2.33 (br. s, 3 H), 1.19 (br. s, 6 H).

2-methyl-2-(methyldisulfanyl)propyl (2-(2-(2-(2-azidoethoxy)ethoxy)ethoxy)ethyl)(4-((((4-nitrophenoxy)carbonyl)oxy)methyl)phenyl)carbamate (30 mg, 0.045 mmol) in DCM (3 mL, 46.625 mmol) was placed in a 25-mL flask under nitrogen, and cooled to 0°C. Amine (40.8 mg, 0.049 mmol) in DCM (2 mL) and Hunig's Base (0.024 mL, 0.135 mmol) were added, followed by DMAP (1.4 mg, 0.011 mmol). The reaction mixture was then slowly warmed to room temperature, stirred for 3 h, concentrated under vacuum, and purified by flash chromatography (EtOAc/Hep 50% to 100%, followed by MeOH/EtOAc 3% to 8%) to obtain 45.0 mg of pure azido-PEG3-disulfidyl dimethyl-PAB-eribulin. 1H NMR (400 MHz) δ ppm 7.32 (d, 2 H, *J* = 8.0 Hz), 7.25 (d, 2 H, *J* = 7.2 Hz), 5.28 (dd, 1 H, *J* = 5.6, 5.6 Hz), 5.11-5.04 (m, 3 H), 4.93 (s, 1 H), 4.88 (s, 1 H), 4.81 (s, 1 H), 4.69 (dd, 1 H, *J* = 4.4, 4.4 Hz), 4.60 (dd, 1 H, *J* = 4.2, 4.2 Hz), 4.36 (br. s, 1 H), 4.33(dd, 1 H,  *J* = 4.0, 2.0), 4.29 (ddd, 1 H, *J* = 9.6, 4.4, 4.4 Hz), 4.18 (dd, 1 H, *J* = 6.4, 4.4 Hz), 4.14-4.04 (m, 3 H), 4.03 (dd, 1 H, *J* = 6.4, 4.4 Hz), 3.97-3.89 (m, 3 H), 3.84-3.78 (m, 3 H), 3.67-3.56 (m, 14 H), 3.42 (s, 3 H), 3.40-3.35 (m, 1 H), 3.37 (dd, 2 H, *J* = 5.2, 5.2 Hz), 3.27 (d, 1 H, *J* = 3.2 Hz), 3.20 (ddd, 1 H, *J* = 12.8, 6.0, 6.0 Hz), 2.91-2.83 (m, 2 H), 2.70 (dd, 1 H, *J* = 16.0, 10.0 Hz), 2.52-2.2.40 (m, 3 H), 2.35-2.13 (m, 9 H), 2.10-2.06 (m, 1 H), 2.01-1.89 (m, 4 H), 1.78-1.64 (m, 4 H), 1.60-1.52 (m, 4 H), 1.49-1.28 (m, 5 H), 1.22-1.07 (m, 6 H), 1.09 (d, 3 H, *J* = 6.0 Hz).

*Mal-PEG4-triazole-PEG3-disulfidyl dimethyl-PAB-eribulin*

A mixture of azido-PEG3-disulfidyl dimethyl-PAB-eribulin (9.0 mg, 7.151 µmol) and 3-(2,5-dioxo-2,5-dihydro-1H-pyrrol-1-yl)-N-(3,6,9,12-tetraoxapentadec-14-yn-1-yl)propanamide (6.8 mg, 0.018 mmol) in tert-butanol (1.5 mL) and water (0.5 mL) was degassed for 45 min. Copper iodide on amberlyst-21 (1.23 mmol/g, 10 mg) was then added, and degassed for an additional 30 min. The reaction mixture was stirred at room temperature for 18 h, and monitored by UPLC/MS. The majority of the starting material was consumed, and the desired product showed as a major peak. The mixture was then separated from resin, and purified on HPLC (acetonitril/water with 0.05 % formic acid) to obtain 1.5 mg of Mal-PEG4-triazole-PEG3-disulfidyl dimethyl-PAB-eribulin. 1H NMR (400 MHz) δ ppm 7.74 (s, 1 H), 7.32 (d, 2 H, *J* = 8.4 Hz), 7.27-7.25 (m, 2 H), 6.69 (br s, 2 H), 5.43 (dd, 1 H, *J* = 5.6, 5.6 Hz), 5.14-5.06 (m, 3 H), 4.95 (s, 1 H), 4.89 (s, 1 H), 4.82 (s, 1 H), 4.70 (dd, 1 H, *J* = 4.4, 4.4 Hz), 4.66 (s, 2 H), 4.62 (dd, 1 H, *J* = 4.4, 4.4 Hz), 4.52(dd, 1 H,  *J* = 5.2, 5.2 Hz), 4.38-4.31 (m, 2 H), 4.30 (ddd, 1 H, *J* = 10.4, 4.0, 4.0 Hz), 4.20 (dd, 1 H, *J* = 6.4, 4.4 Hz), 4.16-4.05 (m, 3 H), 4.04 (dd, 1 H, *J* = 6.4, 4.4 Hz), 3.99-3.91 (m, 3 H), 3.87-3.80 (m, 6 H), 3.70-3.59 (m, 22 H), 3.53 (dd, 2 H, *J* = 5.2, 5.2 Hz), 3.44 (s, 3 H), 3.43-3.36 (m, 3 H), 3.29 (d, 1 H, *J* = 2.8 Hz), 3.18 (ddd, 1 H, *J* = 12.9, 6.2, 6.2 Hz), 2.92-2.84 (m, 2 H), 2.72 (dd, 1 H, *J* = 16.0, 10.0 Hz), 2.54-2.42 (m, 5 H), 2.37-1.90 (m, 19 H), 178-1.52 (m, 3 H), 1.50-1.14 (m, 16 H), 1.10 (d, 3 H, *J* = 6.0 Hz). LCMS (M+H)=1642.1.

*Azido-PEG3-sulfonamide-PAB-eribulin*

4-(((tert-butyldimethylsilyl)oxy)methyl)aniline (315 mg, 1.327 mmol) was dissolved in DCM (10 mL) cooled to 0° C. Pyridine (0.268 mL, 3.317 mmol) was then added, followed by 5-cyanopyridine-2-sulfonyl chloride (365 mg, 1.801 mmol) in DCM (10 mL) over 15 min. The reaction mixture was slowly warmed to room temperature over 1 h, and stirred for 2 h. The reaction mixture was diluted with EtOAc (50 mL), washed with brine, dried over sodium sulfate, and concentrated under vacuum to obtain 610 mg (103%) of N-(4-(((tert-butyldimethylsilyl)oxy)methyl)phenyl)-5-cyanopyridine-2-sulfonamide. The crude product was reasonably pure, though colored. 1H NMR (400 MHz) δ ppm 8.94 (dd, 1 H, *J* = 1.8, 0.6 Hz), 8.10 (dd, 1 H, *J* = 8.4, 2.0 Hz), 7.99 (dd, 1 H, *J* = 8.0, 0.8 Hz), 7.18 (d, 2 H, *J* = 8.2 Hz), 7.15 (br s, 1 H), 7.11 (dd, 2 H, *J* = 6.8, 0.8 Hz), 4.64 (s, 2 H), 0.90 (s, 9 H), 0.05 (s, 6 H).

N-(4-(((tert-butyldimethylsilyl)oxy)methyl)phenyl)-5-cyanopyridine-2-sulfonamide (105.0 mg, 0.26 mmol) and 2-(2-(2-(2-azidoethoxy)ethoxy)ethoxy)ethyl 4-methylbenzenesulfonate (143 mg, 0.383 mmol) were dissolved in DMF (4 mL). Potassium carbonate (K2CO3) (144 mg, 1.041 mmol) was then added, followed by tetrabutylammonium iodide (19.2 mg, 0.052 mmol), and the reaction mixture was stirred for 36 h at 50°C. Progress of the reaction was monitored by UPLC/MS. A saturated solution of NH4Cl (10 mL) was added, extracted with EtOAc/Hep (2:1, 30 mL), washed with brine, dried over sodium sulfate, and concentrated. The crude material was purified by flash chromatography (EtOAc/Hep 25% to 80%) to obtain 118.0 mg of N-(2-(2-(2-(2-azidoethoxy)ethoxy)ethoxy)ethyl)-N-(4-(((tert-butyldimethylsilyl)oxy)methyl)phenyl)-5-cyanopyridine-2-sulfonamide (75%). 1H NMR (400 MHz) δ ppm 8.99 (dd, 1 H, *J* = 1.8, 0.6 Hz), 8.08 (dd, 1 H, *J* = 8.2, 2.2 Hz), 7.86 (dd, 1 H, *J* = 8.0, 0.8 Hz), 7.24 (d, 2 H, *J* = 10 Hz), 7.09 (d, 2 H, *J* = 8.8 Hz), 4.69 (s, 2 H), 4.06 (dd, 2 H, *J* = 6.0, 6.0 Hz), 3.67 (dd, 2 H, *J* = 5.2, 5.2 Hz), 3.65 – 3.62 (m, 4 H), 3.58 (dd, 2 H, *J* = 6.2, 6.2 Hz), 3.56 – 3.53 (m, 4 H), 3.38 (dd, 2 H, *J* = 5.2, 5.2 Hz), 0.93 (s, 9 H), 0.08 (s, 6 H).

N-(2-(2-(2-(2-azidoethoxy)ethoxy)ethoxy)ethyl)-N-(4-(((tert-butyldimethylsilyl)oxy)methyl)phenyl)-5-cyanopyridine-2-sulfonamide (150 mg, 0.248 mmol) was dissolved in methanol (6 mL). Water (0.60 mL) was then added, followed by acetic acid (0.60 mL, 10.481 mmol). The reaction mixture was slowly warmed to 38°C, and stirred for 14 h. The majority of the solvent was removed under vacuum. The residue was diluted with EtOAc (30 mL), washed with water (2 X 5 mL), NaHCO3, and brine, dried over sodium sulfate, and concentrated under vacuum. The crude material was purified by flash chromatography (EtOAc/Hep 35% to 90%) to obtain 105.0 mg of N-(2-(2-(2-(2-azidoethoxy)ethoxy)ethoxy)ethyl)-5-cyano-N-(4-(hydroxymethyl)phenyl)pyridine-2-sulfonamide (84%). 1H NMR (400 MHz) δ ppm 8.99 (d, 1 H, *J* = 1.2 Hz), 8.09 (dd, 1 H, *J* = 8.4, 2.0 Hz), 7.88 (dd, 1 H, *J* = 8.4, 0.8 Hz), 7.30 (d, 2 H, *J* = 8.8 Hz), 7.15 (d, 2 H, *J* = 8.4 Hz), 4.67 (s, 2 H), 4.06 (dd, 2 H, *J* = 6.2, 6.2 Hz), 3.66 (dd, 2 H, *J* = 5.0, 5.0 Hz), 3.65 – 3.58 (m, 6 H), 3.55 – 3.51 (m, 4 H), 3.38 (dd, 2 H, *J* = 5.2, 5.2 Hz.

N-(2-(2-(2-(2-azidoethoxy)ethoxy)ethoxy)ethyl)-5-cyano-N-(4-(hydroxymethyl)phenyl)pyridine-2-sulfonamide (45 mg, 0.092 mmol) was dissolved in DCM (3 mL), and cooled to 0°C following the addition of pyridine (0.015 mL, 0.183 mmol). 4-nitrophenyl carbonochloridate (20.3 mg, 0.101 mmol) in DCM (2 mL) and DMAP (2.3 mg, 0.018 mmol) was then added. The reaction mixture was slowly warmed to room temperature and stirred for 2 h. UPLC/MS indicated that some starting material remained. The reaction mixture was then concentrated under vacuum, and purified by flash chromatography (EtOAc/Hep 12% to 40%) to obtain 35 mg of 4-((N-(2-(2-(2-(2-azidoethoxy)ethoxy)ethoxy)ethyl)-5-cyanopyridine)-2-sulfonamido)benzyl (4-nitrophenyl) carbonate (58%), and 20 mg of starting material. 1H NMR (400 MHz) δ ppm 8.99 (d, 1 H, *J* = 0.8 Hz), 8.27 (dd, 2 H, *J* = 9.2, 2.0 Hz), 8.12 (dd, 1 H, *J* = 7.6, 2.0 Hz), 7.92 (d, 1 H, *J* = 8.4 Hz), 7.38 (d, 4 H, *J* = 9.6 Hz), 7.26 (d, 2 H, *J* = 8.8 Hz), 5.45 (s, 2 H), 4.06 (dd, 2 H, *J* = 5.8, 5.8 Hz), 3.67 – 3.58 (m, 8 H), 3.58 – 3.50 (m, 4 H), 3.38 (dd, 2 H, *J* = 6.1, 6.1 Hz).

4-(N-(2-(2-(2-(2-azidoethoxy)ethoxy)ethoxy)ethyl)-5-cyanopyridine-2-sulfonamido)benzyl (4-nitrophenyl) carbonate (35.0 mg, 0.053 mmol) was placed in a 25-mL flask under nitrogen, and cooled to 0°C. Amine (48.5 mg, 0.059 mmol) in DCM (3 mL, 46.625 mmol) and Hunig's Base (0.037 mL, 0.214 mmol) was then added, followed by DMAP (2.61 mg, 0.021 mmol). The reaction mixture was stirred for 30 min at 0°C, and then stirred for an additional 6 h at room temperature. The reaction mixture was concentrated under vacuum, and purified by flash chromatography (EtOAc/Hep 50% to 100%, followed by MeOH/EtOAc 3% to 8%) to obtain 61.0 mg of pure azido-PEG3-sulfonamide-PAB-eribulin. 1H NMR (400 MHz) δ ppm 8.98 (d, 1 H, *J* = 1.2 Hz), 8.10 (dd, 1 H, *J* = 8.2, 1.8 Hz), 7.87 (d, 1 H, *J* = 8.0 Hz), 7.26 (d, 2 H, *J* = 6.8 Hz), 7.13 (d, 2 H, *J* = 8.4 Hz), 5.29 (dd, 1 H, *J* = 5.6, 5.6 Hz), 5.08-5.00 (m, 3 H), 4.92 (s, 1 H), 4.87 (s, 1 H), 4.80 (s, 1 H), 4.68 (dd, 1 H, *J* = 4.6, 4.6 Hz), 4.59 (dd, 1 H, *J* = 4.6, 4.6 Hz), 4.38-4.30 (m, 2 H), 4.28 (ddd, 1 H,  *J* = 10.4, 4.0, 4.0, Hz), 4.17 (dd, 1 H, *J* = 6.2, 4.6 Hz), 4.13-4.01 (m, 4 H), 3.97-3.88 (m, 3 H), 3.82-3.78 (m, 1 H), 3.67-3.50 (m, 15 H), 3.41 (s, 3 H), 3.40-3.33 (m, 1 H), 3.37 (dd, 2 H, *J* = 4.8, 4.8 Hz), 3.27 (d, 1 H, *J* = 3.2 Hz), 3.15 (ddd, 1 H, *J* = 12.8, 6.4, 6.4 Hz), 2.90-2.82 (m, 2 H), 2.70 (dd, 1 H, *J* = 16.0, 10.0 Hz), 2.51-2.40 (m, 3 H), 2.34-2.13 (m, 7 H), 2.10-2.05 (m, 1 H), 1.99-1.88 (m, 4 H), 1.78-1.64 (m, 5 H), 1.62-1.52 (m, 2 H), 1.50-1.29 (m, 4 H), 1.08 (d, 3 H, *J* = 6.8 Hz).

*Mal-PEG4-triazole-PEG3-sulfonamide-PAB-eribulin*

A mixture of azido-PEG3-sulfonamide-PAB-eribulin (10 mg, 8.023 µmol) and 3-(2,5-dioxo-2,5-dihydro-1H-pyrrol-1-yl)-N-(3,6,9,12-tetraoxapentadec-14-yn-1-yl)propanamide (9.20 mg, 0.024 mmol) in tert-butanol (2.1 mL) and water (0.7 mL) was degassed for 45 min. Copper iodide on amberlyst-21 (1.23 mmol/g, 15 mg) was then added, and degassed for an additional 30 min. The reaction mixture was stirred at room temperature for 18 h, and was monitored by UPLC/MS. The majority of the starting material was consumed, and the desired product showed as a major peak. The reaction mixture was then separated from resin, and purified on preparative TLC (DCM/methanol, 7%) to yield 5.5 mg of Mal-PEG4-triazole-PEG3-sulfonamide-PAB-eribulin. 1H NMR (400 MHz, CD2Cl2) δ ppm 9.01 (s, 1 H), 8.15 (dd, 1 H, *J* = 8.0, 1.8 Hz), 7.87 (d, 1 H, *J* = 8.0 Hz), 7.75 (s, 1 H), 7.28 (d, 2 H, *J* = 8.0 Hz), 7.14 (d, 2 H, *J* = 8.4 Hz), 6.68 (s, 2 H), 6.47 (br s, 1 H), 5.44 (br s, 1 H), 5.10-5.02 (m, 3 H), 4.94 (s, 1 H), 4.86 (s, 1 H), 4.80 (s, 1 H), 4.68 (dd, 1 H, *J* = 4.4, 4.4 Hz), 4.59 (s, 2 H), 4.56 (dd, 1 H, *J* = 4.4, 4.4 Hz), 4.51(dd, 2 H, *J* = 5.2, 5.2, Hz), 4.34(d, 1 H,  *J* = 7.6, Hz), 4.30-4.23 (m, 2 H), 4.19 – 4.14 (m, 2 H), 4.08 (dd, 1 H, *J* = 4.0, 4.0 Hz), 4.03 – 3.98 (m, 2 H), 3.94 – 3.72 (m, 8 H), 3.68 – 3.46 (m, 28 H), 3.38 (s, 3 H), 3.38 – 3.33 (m, 3 H), 3.27 (d, 1 H, *J* = 3.2 Hz), 3.16 – 3.02 (m, 2 H), 2.90 – 2.81 (m, 2 H), 2.68 (dd, 1 H, *J* = 16.2, 9.8 Hz), 2.54-2.40 (m, 7H), 2.40-1.8 (m, 11 H), 1.80-1.50 (m, 3 H), 1.48-1.25 (m, 3 H), 1.09 (d, 3 H, *J* = 6.4 Hz). LCMS (M+H)=1630.0.

*Mal-PEG2-eribulin*

To 5 mg of eribulin in 0.5 mL DMF (7 µmol) 5 mg (14 µmol) of maleimido-PEG2-NHS (Broadpharm) and 2.4 µl (14 µmol) of Hunig’s base. The reaction mixture was stirred at room temperature for 2 h. The reaction mixture was then purified by HPLC (water—acetonitrile gradient 30-70% containing 0.1% formic acid). Eluent was collect by mass, and lyophilized to dryness. Final yield was 3.7 mg (3.8 µmol, 54%). LCMS (M+H) = 969.6 Da.

*Mal-PEG4-eribulin*

To 5 mg of eribulin in 0.5 mL DMF (7 µmol) 6.2 mg (14 µmol) of maleimido-PEG4-NHS (Broadpharm) and 2.4 µl (14 µmol) of Hunig’s base. The reaction mixture was stirred at room temperature for 2 h. The reaction mixture was then purified by HPLC (water—acetonitrile gradient 30-70% containing 0.1% formic acid). Eluent was collect by mass, and lyophilized to dryness. Final yield was 3.7 mg (3.5 µmol, 50%). LCMS (M+H) = 1057.7 Da.

*Azido-PEG2-eribulin*

To 5 mg of eribulin in 0.5 mL DMF (7 µmol) 4.2 mg (14 µmol) of azido-PEG2-NHS (Broadpharm) and 2.4 µl (14 µmol) of Hunig’s base. The reaction mixture was stirred at room temperature for 2 h. The reaction mixture was then purified by HPLC (water—acetonitrile gradient 30-70% containing 0.1% formic acid). Eluent was collect by mass, and lyophilized to dryness. Final yield was 2.2 mg (2.4 µmol, 34%). LCMS (M+H) = 915.7 Da.

*Azido-PEG4-eribulin*

To 5 mg of eribulin in 0.5 mL DMF (7 µmol) 5.5 mg (14 µmol) of azido-PEG4-NHS (Broadpharm) and 2.4 µl (14 µmol) of Hunig’s base. The reaction mixture was stirred at room temperature for 2 h. The reaction mixture was then purified by HPLC (water—acetonitrile gradient 30-70% containing 0.1% formic acid). Eluent was collect by mass, and lyophilized to dryness. Final yield was 3.0 mg (3.0 µmol, 43%). Predicted exact mass 1002.5 Da, measured mass 1003.7 Da [M+H].

*Mal-PEG2-Val-Cit-PAB-cryptophycin*

Piperazine (130 mg, 1.509 mmol) was dissolved in DMF (4.5 mL), cooled to 0°C and Hunig's Base (0.112 mL, 0.644 mmol) was added, followed by 4-((2R,3R)-3-((S)-1-((3S,10R,16S,E)-10-(3-chloro-4-methoxybenzyl)-3-isobutyl-6,6-dimethyl-2,5,9,12-tetraoxo-1-oxa-4,8,11-triazacyclohexadec-13-en-16-yl)ethyl)oxiran-2-yl)benzyl methanesulfonate (50 mg, 0.064 mmol) in THF (2.0 mL). Reaction mixture was slowly warmed up to room temperature and stirred for 14 h. Ethyl aceate (30 mL) was added to dilute the reaction mixture and washed with saturated aqueous NaHCO3 ( 3 X 10 mL), water (3 X 10 mL), dried over Na2SO4 and concentrated under vacuum to yield 53.0 mg of desired product (100%, 93% purity) ; 1H NMR (400 MHz, CDCl3) δ 7.30 (d, *J* = 8.4 Hz, 2*H*), 7.17 - 7.15 (m, 3*H*), 7.10 (dd, *J* = 2.0, 8.4 Hz, 1*H*), 6.95 (dd, *J* = 2.2, 8.4 Hz, 1*H*), 6.82 (d, *J* = 8.4 Hz, 1*H*), 6.71 (ddd, *J* = 4.0, 10.8, 14.8 Hz, 1*H*), 5.94 (d, *J* = 8.4 Hz, 1*H*), 5.72 – 5.65 (m, 2*H*), 5.25 (ddd, *J* = 2.2, 4.4, 11.2 Hz, 1*H*), 4.63 (ddd, J = 4.8, 7.6, 7.6 Hz, 1*H*), 4.43 (ddd, *J* = 5.2, 9.2, 9.2 Hz, 1*H*), 3.86 (s, 3*H*), 3.64 (d, *J* = 1.6 Hz, 1*H*), 3.46 (s, 2*H*), 3.45 – 3.42 (m, 1*H*), 3.12 (dd, *J* = 2.4, 13.2 Hz, 1*H*), 3.06 (dd, *J* = 5.2, 13.4 Hz, 1*H*), 2.98-2.86 (m, 5*H*), 2.55-2.36 (m, 6*H*), 1.88-1.74 (m, 4*H*), 1.57-1.49 (m, 1*H*), 1.44-1.30 (m, 2*H*), 1.16 (s, 3*H*), 1.12 (d, *J* = 7.6 Hz, 3*H*), 1.11 (s, 3*H*), 0.84 (d, *J* = 6.0 Hz, 3*H*), 0.83 (d, *J* = 6.8 Hz, 3*H*); LC/MS (M+H)= 766.14.

Fmoc-Val-Cit-PAB-PNP (16.1 mg, 0.021 mmol) was dissolved in *N*,*N*-dimethylformamide (DMF) (1.0 mL), cooled to 0°C and Hunig’s base (0.11 mL, 0.063 mmol) was added followed by cryptophycin analog (16.1 mg, 0.021 mmol) in a mixture of EtOAc (1.1 mL) and THF (0.5 mL). Reaction was stirred at room temperature for 0.5 h while it was monitored by high performance liquid chromatography (HPLC). Diethylamine (0.01 mL, 0.065 mmol) was added to the reaction mixture and stirred for an additional 2 h until the reaction was complete. The solvent was removed under vacuum and the residue was washed with benzene (2 X 2 mL) and dried under high vacuum to isolate 25 mg of solid ( 99%) which was taken to the next step without further purifications; LCMS (M+H)= 1171.73.

4-((S)-2-((S)-2-amino-3-methylbutanamido)-5-ureidopentanamido)benzyl-4-(4-((2R,3R)-3-((S)-1-((3S,10R,16S,E)-10-(3-chloro-4-methoxybenzyl)-3-isobutyl-6,6-dimethyl-2,5,9,12-tetraoxo-1-oxa-4,8,11-triazacyclohexadec-13-en-16-yl)ethyl)oxiran-2-yl)benzyl)piperazine-1-carboxylate (25 mg, 0.021 mmol) was dissolved in DMF (2 mL) , cooled to 0°C and Hunig's Base (0.01 mL, 0.057 mmol) was added, followed by 2,5-dioxopyrrolidin-1-yl3-(2-(2-(2,5-dioxo-2,5-dihydro-1H-pyrrol-1-yl)ethoxy)ethoxy)propanoate (20 mg, 0.056 mmol) in THF (0.7 mL). Reaction mixture was warmed to room temperature and stirred for 2 h. Solvent was removed *in vacuo* and and residue was dissolved in DMF and purified on HPLC (CH3CN/H2O/Formic Acid, 45-50%, 10 min, C-Ph column). Desired fractions were collected and concentrated under vacuum to yield 13.2 mg of Mal-PEG2-Val-Cit-PAB-cryptophycin; 1H NMR (400 MHz, CDCl3) δ 9.11 (s, 1*H*), 7.49 (d, *J* = 8.0 Hz, 2*H*), 7.44 (br. s, 1*H*), 7.21 - 7.15 (m, 3*H*), 7.10 (d, *J* = 7.6 Hz, 2*H*), 7.14 - 7.09 (m, 1*H*), 6.93 (d, *J* = 8.0 Hz, 1*H*), 6.67 - 6.62 (m, 1*H*), 6.63 (s, 2*H*), 6.25 (d, *J* = 8.0 Hz, 1*H*), 5.77 (br. s, 1*H*), 5.64 (d, *J* = 15.2 Hz, 1*H*), 5.63 (br. s, 1*H*), 5.21 (d, *J* = 6.8 Hz, 1*H*), 4.97 (s, 2*H*), 4.90 (br. s, 2*H*), 4.59 (br. s, 1*H*), 4.52 - 4.46 (m, 1*H*), 4.40 - 4.36 (m, 1*H*), 4.27 (br. s, 1*H*), 3.78 (s, 3*H*), 3.68 - 3.32 (m, 17*H*), 3.15 (br. s, 2*H*), 3.03 (dd, *J* = 13.2, 13.2 Hz, 2*H*), 2.88 - 2.80 (m, 2*H*), 2.45 - 2.22 (m, 8*H*), 2.15 - 2.00 (m, 1*H*), 1.98 -1.58 (m, 6*H*), 1.42 - 1.22 (m, 6*H*), 1.07 (d, *J* = 7.2 Hz, 6*H*), 1.05 (d, *J* = 7.6 Hz, 3*H*), 0.85 (br. s, 6*H*), 0.76 (d, *J* = 7.2 Hz, 3*H*), 0.74 (d, *J* = 7.2 Hz, 3*H*); LC/MS (M+H) = 1411.70.
