# Supplementary material for: MORAb-202, an Antibody–Drug Conjugate Utilizing Humanized Anti-human FRα Farletuzumab and the Microtubule-targeting Agent Eribulin, has Potent Antitumor Activity
Source: Oxford University Press journal article supplement (doi:10.1158/1535-7163.mct-17-1215), 2018-09-27
Supplement: 15357163mct171215-sup-193553_3_supp_4964321_p555vr.doc [file 15357163mct171215-sup-193553_3_supp_4964321_p555vr.doc]

Supplementary Figure S7


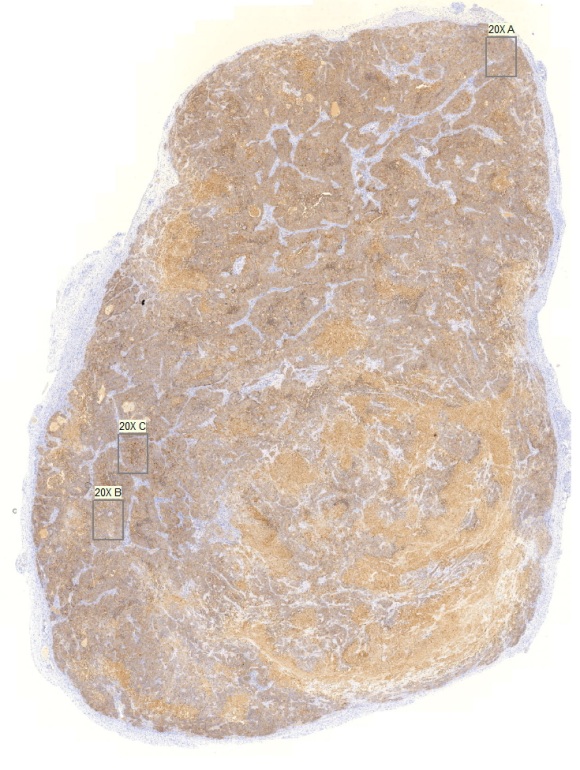

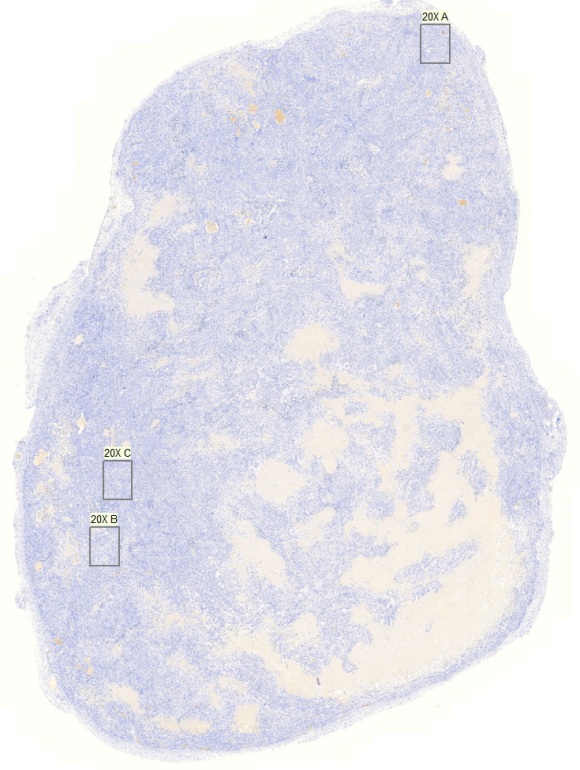

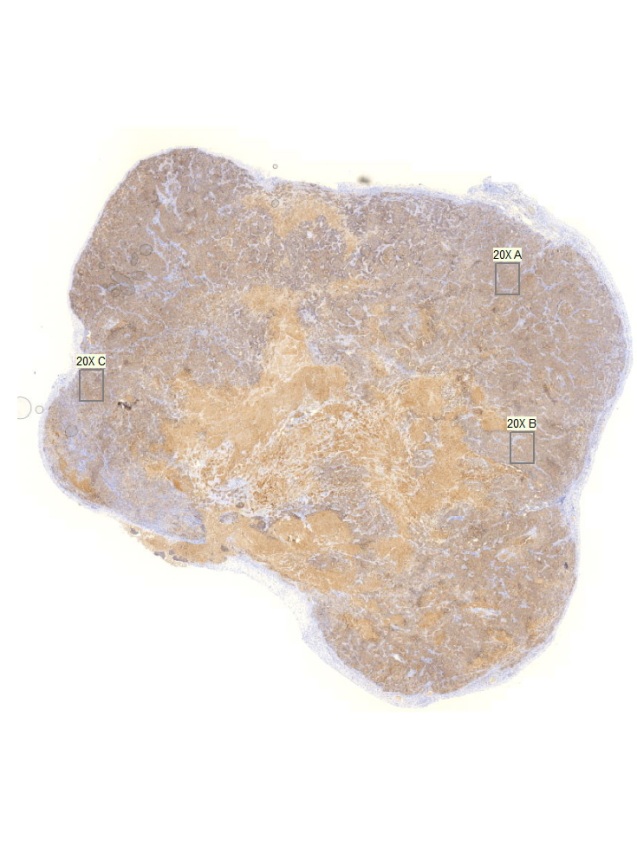

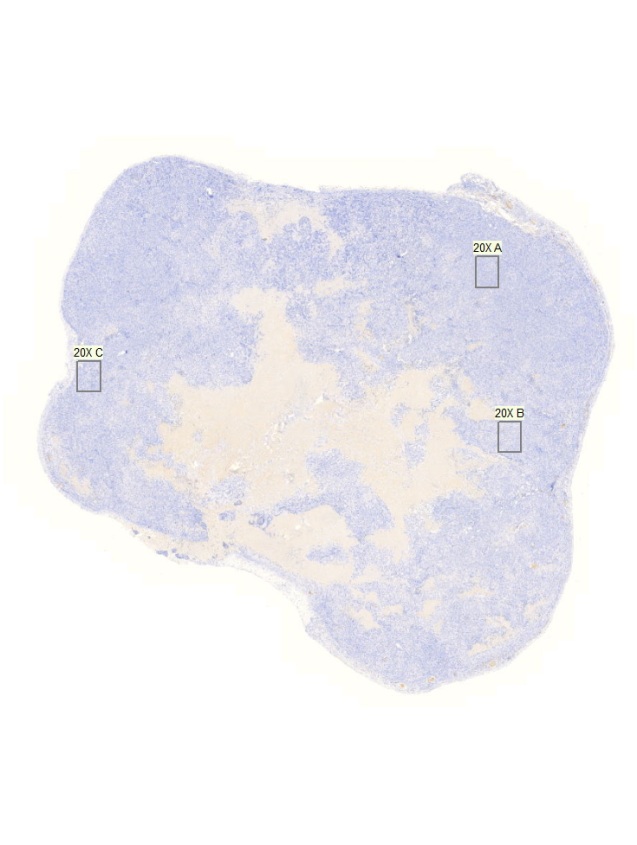

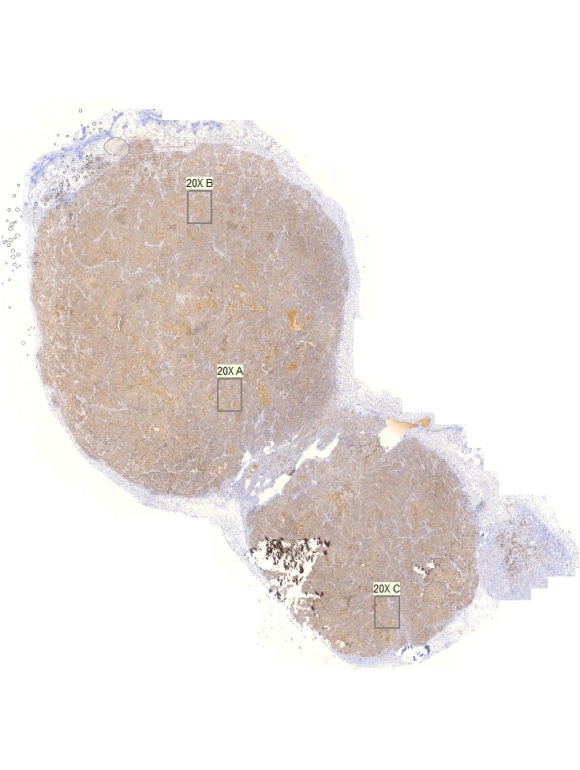

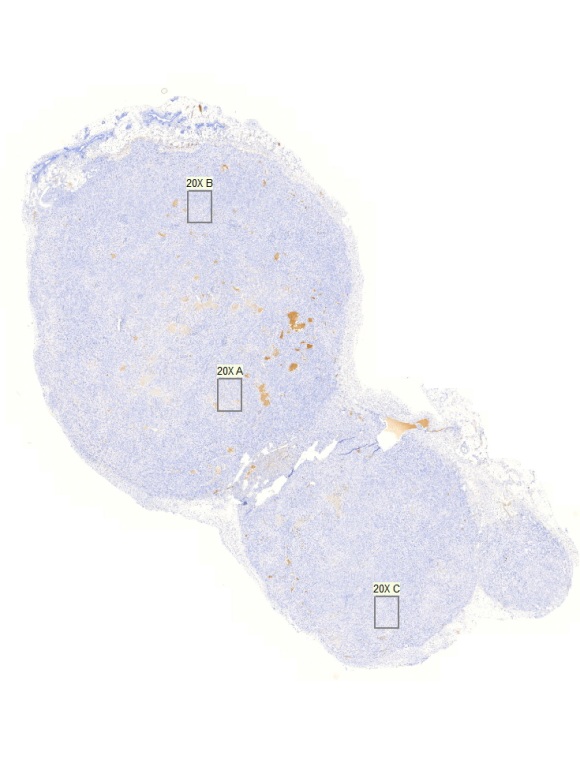

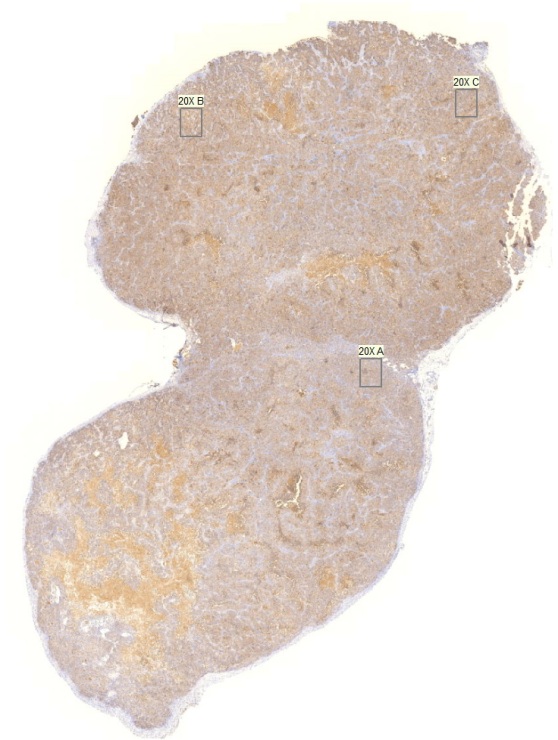

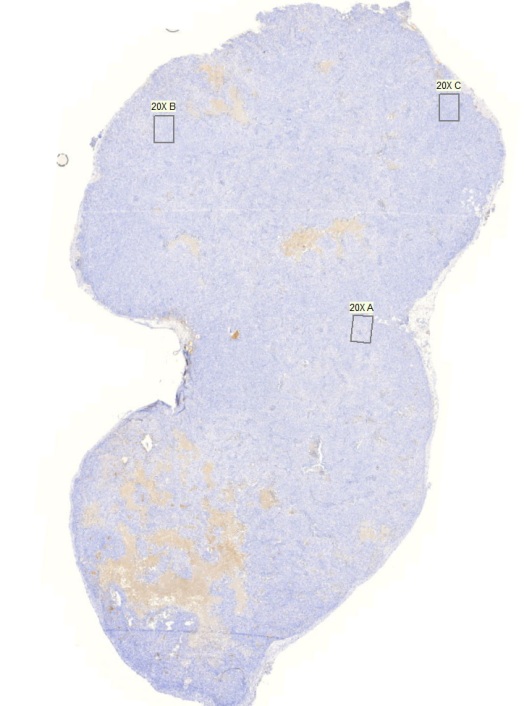

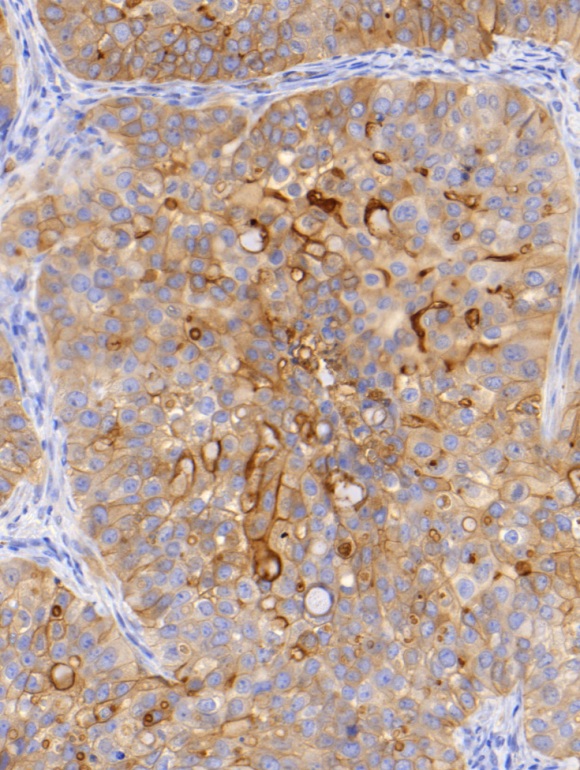

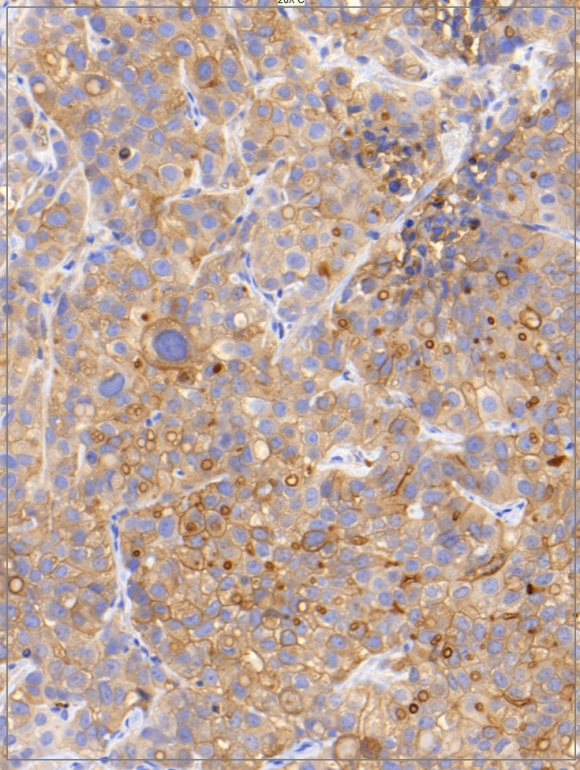

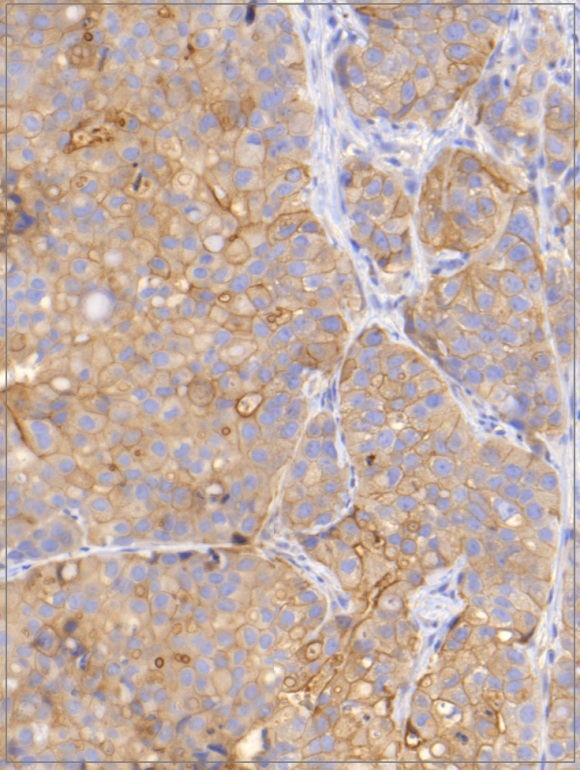

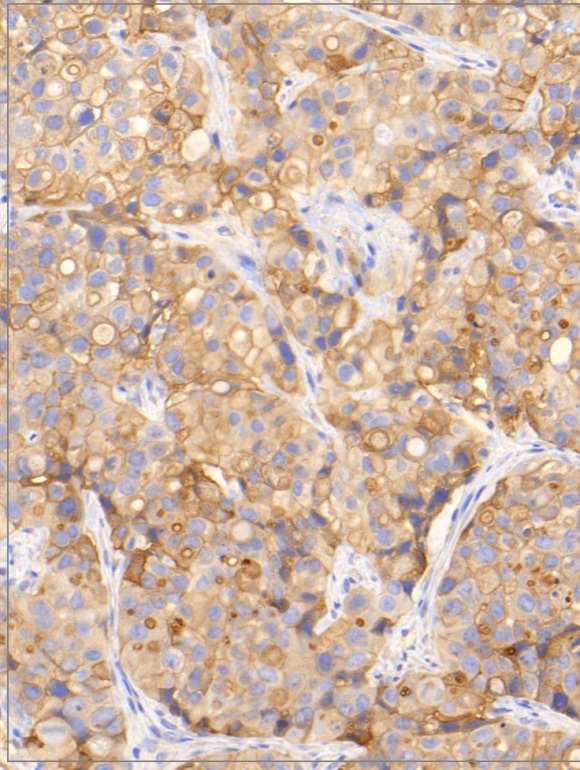
A

Isotype control

Anti-FRA

Anti-FRA (detail)

Isotype control

Anti-FRA

Anti-FRA (detail)

B

FRA expression on regrown MORAb-202-treated LXFA-737 non-small cell lung carcinoma PDX tumors

A . FRA immunohistochemical staining of tumors from vehicle-treated LXFA-737-bearing mice (day 32). Isotype control-stained tumors are shown to the left, 26B3-stained tumors to the right. Detail of 26B3-stained tumors is to the far right. B. FRA immunohistochemical staining of tumors from MORAb-202-treated LXFA-737-bearing mice (day 74). Methods are detailed in main text.
