# Supplementary material for: MORAb-202, an Antibody–Drug Conjugate Utilizing Humanized Anti-human FRα Farletuzumab and the Microtubule-targeting Agent Eribulin, has Potent Antitumor Activity
Source: Oxford University Press journal article supplement (doi:10.1158/1535-7163.mct-17-1215), 2018-09-27
Supplement: 15357163mct171215-sup-193553_3_supp_4964325_pdgptv.doc [file 15357163mct171215-sup-193553_3_supp_4964325_pdgptv.doc]

Supplemental Figure S2

A

B

DAR2 Bmax = 1.304, R2 = 0.998

DAR4 Bmax = 2.42, R2 = 0.998

DAR2 Bmax = 1.386, R2 = 0.996

DAR4 Bmax = 2.444, R2 = 0.996

MORAb-202 Bmax = 2.639, R2 = 0.996

DAR-sensitive label-free assay method design and maximal binding determination.

Panel A. Schematic of assay design. Panel B. Binding assay was performed as described in materials and methods, except that a titration from 0.14 µg/ml to 100 µg/ml of anti-eribulin 5E4 was analyzed as the last assay step. The equilibrium level of binding for each binding curve at the end of the association phase was plotted as a function of the 5E4 concentration, and Bmax was determined using a non-linear data fitting (GraphPad Prism). Results are indicated under each panel. Left panel, ADCs in assay buffer. Right panel, ADCs in 1% mouse plasma in assay buffer.
