# Supplementary material for: MORAb-202, an Antibody–Drug Conjugate Utilizing Humanized Anti-human FRα Farletuzumab and the Microtubule-targeting Agent Eribulin, has Potent Antitumor Activity
Source: Oxford University Press journal article supplement (doi:10.1158/1535-7163.mct-17-1215), 2018-09-27
Supplement: 15357163mct171215-sup-193553_3_supp_4964358_pdgpt4.doc [file 15357163mct171215-sup-193553_3_supp_4964358_pdgpt4.doc]

Supplementary Data Figure S5

Specificity of MORAb-202 cytotoxicity
